# Supplementary material for: Assessment of the Genetic Characteristics of a Generation Born during a Long-Term Socioeconomic Crisis
Source: MDPI journal article supplement (doi:10.3390/genes14112064), 2023-11-11
Supplement: s1 [file s1]

**Table S1.** Conditions for PCR, R: the number of repeats in a VNTR

| Gene,<br>polymorphism        | PCR primers                                                    | Annealing<br>temperature,<br>°C | Amplicons'<br>lengths, bp                                |
|------------------------------|----------------------------------------------------------------|---------------------------------|----------------------------------------------------------|
| MAOA,<br>VNTR in<br>promoter | 5'-ACAGCCTGACCGTGGAGAAG-3'<br>5'-GAACGGACGCTCCATTTCGGA-3'      | 63                              | 290 (2R), 320<br>(3R), 335 (3.5R),<br>350 (4R), 380 (5R) |
| SLC6A3,<br>VNTR in 3'-UTR    | 5'-TGCGGTGTAGGGAACGGCCTGA-3'<br>5'-CTTCCTGGAGGTCACGGCTCAAGG-3' | 64                              | 403 (8R),<br>443 (9R), 483<br>(10R), 523 (11R)           |

**Table S2.** Oligonucleotide and TaqMan probe sequences used for real-time PCR analysis of rs17689918, rs1360780, rs53576, rs12720071, rs806377, rs6557168, rs4311, rs4522666, and rs1800497

| SNV        | Oligonucleotide and TaqMan probe sequences                                                                                                         | T <sub>m</sub> ,<br>°C |
|------------|----------------------------------------------------------------------------------------------------------------------------------------------------|------------------------|
| rs17689918 | 5'-GGTTGTTCAAGGCTGTGACTGG-3'<br>5'-CACCACACCTGTCACCCAGT-3'<br>[FAM]CAGATTCAGGCTGAGATTGCGAAC[BHQ1]<br>[HEX]CAGATTCAGGCTGAGATTGCAAAA[BHQ1]           | 60                     |
| rs4311     | 5'-AAGTCTTCCCCAGTTCCTCA-3'<br>5'-GATGGTTAAATTGTCTTAGGGCC-3'<br>[FAM]AGAGGTTGCAAACAGATGGATTAACT[BHQ1]<br>[HEX]AGAGGTTGCAAACAGATGGATTAGCT[BHQ1]      | 59                     |
| rs1360780  | 5'- CAGAAGAGATCCAGGCACAG-3'<br>5'- GCCAGCAGTAGCAAGTAAGA-3'<br>[FAM]AGGCTTTCACATAAGCAAAGTTATAC[BHQ1]<br>[HEX]AGGCTTTCACATAAGCAAAGTTACAC[BHQ1]       | 60                     |
| rs1800497  | 5'-GCAACACAGCCATCCTCAAAGTG-3'<br>5'- CAGCTCACTCCATCCTGGACGT-3'<br>[FAM]CAGCTGGGCGCCTGCCTCGACC[BHQ1]<br>[HEX]CAGCTGGGCGCCTGCCTTGACC[BHQ1]           | 60                     |
| rs6557168  | 5'-CAACAATTTTGGCAAGCAGTC-3'<br>5'-CACCTTCAGTTCACACAGTCTA-3'<br>[FAM]TATCTGCTGAGAAAATATAACCACATA[BHQ1]<br>[HEX]TATCTGCTGAGAAAATATAACCATATAA[BHQ1]   | 61                     |
| rs53576    | 5'-CGGGCACAGCATTTCATGGAA-3'<br>5'-AGGAGGCCTGGTTTGAAGTGT-3'<br>[FAM]TGTTTCTGTGGGACTGAGGATCC[BHQ1]<br>[HEX]TGTTTCTGTGGGACTGAGGACCC[BHQ1]             | 60                     |
| rs12720071 | 5'-TTAGATCTTGAAAGCACAAACACAC-3'<br>5'-CAGGCAGTACCAATGCTCTTT-3'<br>[FAM]CACAAATGCAGTTTCAAAAATGAATCG[BHQ1]<br>[HEX]CACAAATGCAGTTTCAAAAATGAACCG[BHQ1] | 60                     |
| rs806377   | 5'- CATGGGTAAGTCTATCATCACTAAG-3'<br>5'- GGTCCAGTAGGTGATGGCT-3'<br>[FAM]ACCAGTTCTGCACACCTTTCC[BHQ1]<br>[HEX]ACCAGTTCTGCACACCTCTCC[BHQ1]             | 60                     |

---

|           |                                    |    |
|-----------|------------------------------------|----|
| rs4522666 | 5'-CGTCCTAAGCAGCGAGCTT-3'          | 65 |
|           | 5'-GTGTGCCGTGCTTTGCATTT-3'         |    |
|           | [FAM]AAACTGATTTCTTGACCCACGGT[BHQ1] |    |
|           | [HEX]AAACTGATTTCTTGACCCATGGT[BHQ1] |    |

---
